# Supplementary material for: Deciphering the Impact of PROM1 Alternative Splicing on Human Photoreceptor Development and Maturation
Source: Research Square preprint supplement (doi:10.21203/rs.3.rs-4348361/v1), 2024-05-24
Supplement: Supplementary file 1 [file 02c416de1f0096acd8991800.xlsx]

## Sheet: Immunofluorescence antibodies
List of primary antibodies used for immunofluorescence analyses.
	Target	Host	Dilution	Supplier	Product code
	Arl13b	Rabbit	1:500	Proteintech	17711-1-AP
	Arrestin-3	Rabbit	1:100	Novus Biologicals	NBP2-41249
	CRALBP	Mouse	1:200	Abcam	ab15051
	Opsin R/G	Rabbit	1:200	Sigma-Aldrich	AB5405
	Pericentrin	Mouse	1:1000	Abcam	ab28144
	Prominin-1 N-terminal	Mouse	1:200	Abnova	MA1-219
	Prominin-1	Rabbit	1:100	Thermo Fisher Scientific	PA5-82184
	Peripherin-2	Rabbit	1:200	Proteintech	18109-1-AP
	Recoverin	Rabbit	1:1000	Sigma-Aldrich	AB5585
	Rhodopsin	Mouse	1:200	Sigma-Aldrich	MAB5356
	Endophilin-A3	Rabbit	1:200	St John's Laboratory	STJ25520-50
	TOMM20	Mouse	1:100	Abcam	ab56783
