# Supplementary material for: Deciphering the Impact of PROM1 Alternative Splicing on Human Photoreceptor Development and Maturation
Source: Research Square preprint supplement (doi:10.21203/rs.3.rs-4348361/v1), 2024-05-24
Supplement: Supplementary file 5 [file 73a3b1314da2fd4c21c15bb2.xlsx]

## Sheet: Western blot antibodies
Primary and secondary antibodies used in Western blot analyses.
	Target	Approximate observed MW (kDa)	Host	Dilution	Supplier	Product code
	Arl13b	40-48, 60	Rabbit	1:500	Proteintech	17711-1-AP
	GAPDH	37	Mouse	1:500	Santa Cruz	sc-47724
	LC3B	14, 16	Rabbit	1:500	Cell Signaling	3868S
	p62 Ick ligand	62	Mouse	1:500	BD Transduction laboratories	610832
	Prominin-1 C-terminal	120	Mouse	1:500	Santa Cruz	sc-365537
	Prominin-1 N-terminal	120	Mouse	1:500	Abnova	MA1-219
	Phospho-S6 Ribosomal Protein (Ser235/236)	32	Rabbit	1:500	Cell Signaling	2211
	Recoverin	23	Rabbit	1:500	Sigma-Aldrich	AB5585
	RPE65	65	Mouse	1:500	Abcam	ab13826
	Rabbit anti-mouse immunoglobulins/HRP	NA	NA	1:2000	Dako	P0260
	Swine anti-rabbit immunoglobulins/HRP	NA	NA	1:2000	Dako	P0399
	Abbreviations: MW, Molecular Weight.
